# Supplementary material for: Application of nano-agricultural technology for biotic stress management: mechanisms, optimization, and future perspectives
Source: Royal Society of Chemistry journal article supplement (doi:10.1039/d2en00651k), 2022-01-01
Supplement: d2en00651k1.pdf [file d2en00651k1.pdf]

## Supporting information

### **Application of nano-agricultural technology for biotic stress management: mechanisms, optimization, and future perspectives**

Xuesong Cao<sup>a,b</sup>, Zhenyu Wang<sup>a,b,\*</sup>

*<sup>a</sup>Institute of Environmental Processes and Pollution control, and School of  
Environment and Civil Engineering, Jiangnan University, Wuxi 214122, China*

*<sup>b</sup>Jiangsu Engineering Laboratory for Biomass Energy and Carbon Reduction  
Technology, and Jiangsu Key Laboratory of Anaerobic Biotechnology, Jiangnan  
University, Wuxi 214122, China*

\*Corresponding author:

*Tel.: +86 0510 85911123; Fax: +86 0510 85911123*

*E-mail address: wang0628@jiangnan.edu.cn (Dr. Zhenyu Wang)*

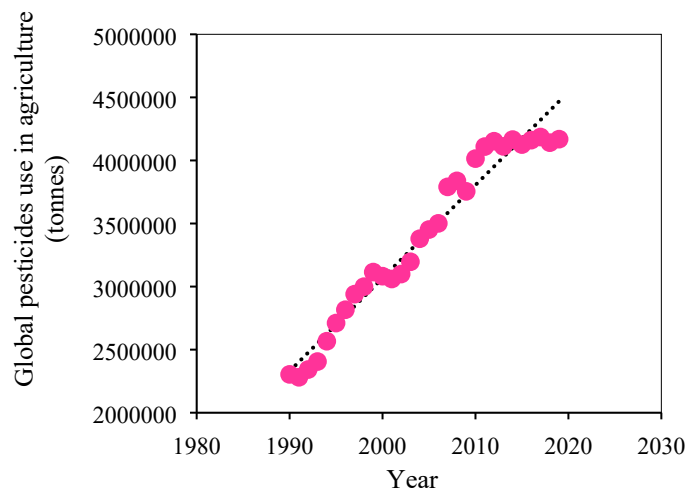

Figure S1. The global pesticides use in agriculture from 1990-2019. Source of data: FAOSTAT (<http://www.fao.org/faostat/en/#data>). Accessed date: 23 April 2022.

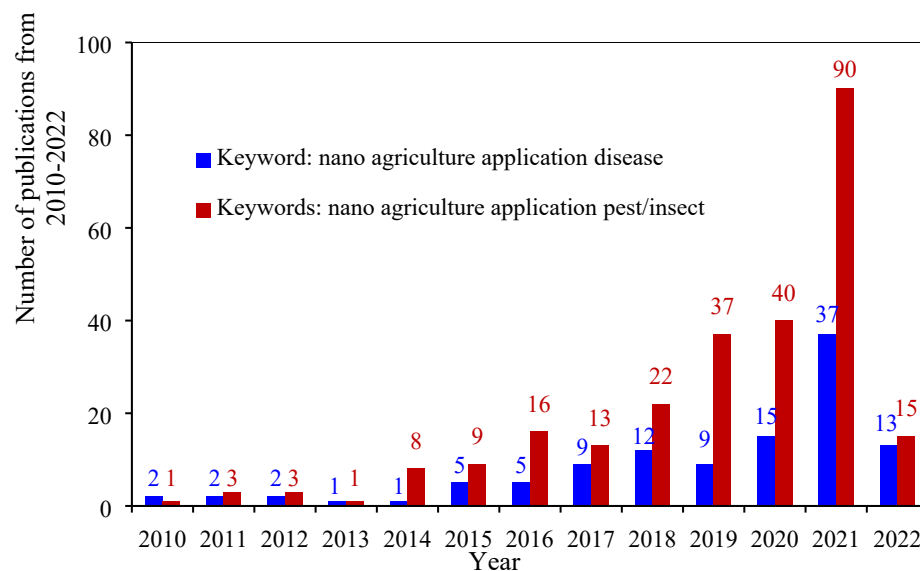

Figure S2. Number of publication related to using nano-agricultural technology in crop disease and pest control from 2010-2022. Source of data: Web of Science. Accessed date: 23 April 2022. Keywords: Nano agriculture application disease/pest/insect.

Table S1 The crop disease and pest occurrence area, prevention and control area, and induced yield loss in China mainland from 2010-2016. Source of data: Ministry of Agriculture and Rural Affairs of the People's Republic of China (<http://zdscxx.moa.gov.cn:8080/nyb/pc/index.jsp>). Accessed date: 23 April 2022.

| Year    | Crop disease and pest<br>occurrence area (1000<br>hectares) | Crop disease and pest<br>prevention and control area<br>(1000 hectares) | Crop disease and pest<br>induced yield loss<br>(tons) |
|---------|-------------------------------------------------------------|-------------------------------------------------------------------------|-------------------------------------------------------|
| 2010    | 367369.07                                                   | 444919.95                                                               | 16211916.37                                           |
| 2011    | 355687.06                                                   | 437928.01                                                               | 13591830.12                                           |
| 2012    | 384621.00                                                   | 481687.00                                                               | 17172212.06                                           |
| 2013    | 359533.44                                                   | 445990.12                                                               | 14180100.00                                           |
| 2014    | 348415.18                                                   | 449141.13                                                               | 13821913.28                                           |
| 2015    | 344643.94                                                   | 438206.56                                                               | 14186794.72                                           |
| 2016    | 321800.43                                                   | 413983.21                                                               | 12295833.87                                           |
| Average | 354581.45                                                   | 444550.85                                                               | 14494371.49                                           |

Table S2 Current investigations on using NMs to control crop diseases and pests.

| NMs                                                           | Application method and dose                       | Host and pathogen/pest                                           | Performance and mechanism                                                                                                                                                                                                                                                                                                            | Reference                               |
|---------------------------------------------------------------|---------------------------------------------------|------------------------------------------------------------------|--------------------------------------------------------------------------------------------------------------------------------------------------------------------------------------------------------------------------------------------------------------------------------------------------------------------------------------|-----------------------------------------|
| Ag <sup>0</sup><br>(size: not reported)                       | Foliar application; 10 and 100 mg/L               | Tobacco; <i>Phytophthora parasitica</i>                          | The disease control efficiency of 100 mg/L Ag <sup>0</sup> NMs was comparable to mefenoxam (33.2 µg of active ingredient/mL). Mechanistically, Ag <sup>0</sup> NMs exhibited high antimicrobial activity.                                                                                                                            | Ali et al. (2015) <sup>29</sup>         |
| Ag <sup>0</sup><br>(size: 18-39 nm)                           | Foliar application; 25, 50, 75, and 100 mg/L      | Rice; <i>Xanthomonas oryzae</i> pv. <i>oryzae</i>                | 100 mg/L Ag <sup>0</sup> NMs inhibited the spread of <i>Xanthomonas oryzae</i> pv. <i>oryzae</i> in rice by 72.5%. Mechanistically, Ag <sup>0</sup> NMs exhibited high antimicrobial activity.                                                                                                                                       | Ahmed et al. (2020) <sup>31</sup>       |
| Ag <sup>0</sup><br>(size: 35 nm)                              | Foliar application; 30, 60, 90, 120, and 150 ppm  | Castor; <i>Spodoptera litura</i> and <i>Helicoverpa armigera</i> | The antifeedant activity of Ag <sup>0</sup> NMs was significantly higher than equivalent mass Ag ions, while lower than equivalent mass Azadirachtin (commercial pesticide).                                                                                                                                                         | Manimegalai et al. (2022) <sup>32</sup> |
| Ag <sup>0</sup><br>(size: not reported)                       | Soil amendment; 20, 40, 200, 500, and 1500 mg/kg  | Tomato; <i>Meloidogyne incognita</i>                             | Ag <sup>0</sup> NMs at 200 mg/kg caused 52.0% mortality of pathogenic nematodes after 3 days exposure, and the application of Ag <sup>0</sup> NMs showed no effect on the growth of plant and the free living nematodes.                                                                                                             | Entsar (2016) <sup>33</sup>             |
| Ag <sup>0</sup><br>(size: 7.7-50.2 nm)                        | Foliar application; 100 mg/L                      | Bean; <i>Bean yellow mosaic virus</i>                            | Ag <sup>0</sup> NMs decreased the disease severity of bean by 25.0-97.3%. Mechanistically, Ag <sup>0</sup> NMs exhibited high antimicrobial activity.                                                                                                                                                                                | Elbeshehy et al. (2015)                 |
| Chitosan Schiff-based Ag <sup>0</sup><br>(size: not reported) | Foliar application; 19.2, 11.5, 5.8, and 2.9 mg/L | Tobacco; <i>Tobacco mosaic virus</i>                             | Chitosan Schiff-base Ag <sup>0</sup> NMs suppressed 72.2 % tobacco mosaic virus spread in tobacco. Mechanistically, chitosan Schiff-base Ag <sup>0</sup> NMs enhanced the antioxidative enzyme activity (superoxide dismutase (SOD), peroxidase (POD), hydrogen peroxidase (CAT), and phenylalanine ammonia lyase (PAL)) in tobacco. | Wang et al. (2016) <sup>30</sup>        |
| Cu <sup>0</sup><br>(size: 5-50 nm)                            | Foliar application; 1.0, 1.5, 2.0, and 2.5 mg/L   | Tea tree; <i>Poria hypolateritia</i>                             | Cu <sup>0</sup> NMs reduced the disease incidence in tea trees and enhanced their yield. Mechanistically, Cu <sup>0</sup> NMs exhibited high antimicrobial activity.                                                                                                                                                                 | Ponmurugan et al. (2016)                |

|                                                                                      |                                                         |                                                       |                                                                                                                                                                                                                                                                                              |                                    |
|--------------------------------------------------------------------------------------|---------------------------------------------------------|-------------------------------------------------------|----------------------------------------------------------------------------------------------------------------------------------------------------------------------------------------------------------------------------------------------------------------------------------------------|------------------------------------|
| Graphene oxide loaded CuO (size: 21.3 nm)                                            | Foliar application; 4 and 8 mg/L                        | Tomato; <i>Pseudomonas syringae</i> pv. <i>tomato</i> | Graphene oxide loaded CuO NMs decreased the disease severity of tomato by 10-55%. Mechanistically, graphene oxide loaded CuO NMs exhibited high antimicrobial activity.                                                                                                                      | Li et al. (2017) <sup>133</sup>    |
| Cu-chitosan (size: 150 nm)                                                           | Seed treatment; 0.01, 0.04, 0.08, 0.12, and 0.16% (w/v) | Maize; <i>Curvularia lunata</i>                       | Cu-chitosan NMs reduced the disease severity of maize. Mechanistically, Cu-chitosan NMs could “mimic” the natural elicitation of the plant defense and antioxidant system to enhance the host disease resistance.                                                                            | Choudhary et al. (2017)            |
| CuO (size: 30 nm)                                                                    | Foliar application; 1000 mg/L                           | Watermelon; <i>Fusarium oxysporum</i>                 | CuO NMs reduced the rank sum of disease ratings of Fusarium wilt in watermelon by about 35% and enhanced the yield of watermelon by 39%-53%. Mechanistically, CuO NMs upregulated the PR gene in watermelon and enhanced the activity of PPO.                                                | Elmer et al. (2018) <sup>39</sup>  |
| CuO (size: 40 nm)                                                                    | Foliar application; 500 mg/L                            | Chrysanthemum; <i>Fusarium oxysporum</i>              | Chrysanthemum treated with CuO NMs had a 30-55% reduction in disease severity as compared with untreated plants. Mechanistically, CuO NMs provided Cu nutrient to chrysanthemum.                                                                                                             | Elmer et al. (2021)                |
| CuO (size: 320 nm)                                                                   | Soil amendment; 31 mg Cu/kg                             | Lettuce; <i>Fusarium oxysporum</i>                    | The fresh shoot biomass of pathogen infected lettuce was significantly enhanced by the presence of CuO NMs. Mechanistically, CuO NMs enhanced the disease resistance in lettuce.                                                                                                             | Shang et al. (2021) <sup>129</sup> |
| CuO (size: 40-80 nm)                                                                 | Root irrigation; 50, 125, and 250 mg/L                  | Tobacco; <i>Ralstonia solanacearum</i>                | The disease index of <i>Ralstonia solanacearum</i> infected tobacco was decreased from 97.3 to 38.1% after treated with 250 mg/L CuO NMs. Mechanistically, CuO NMs exhibited excellent antibacterial activity.                                                                               | Chen et al. (2019)                 |
| CuO (size: 30 nm); Cu <sub>3</sub> (PO <sub>4</sub> ) <sub>2</sub> (size: 50-610 nm) | Foliar application; 500 mg/L                            | Tomato; <i>Fusarium oxysporum</i>                     | Supplementary with Cu <sub>3</sub> (PO <sub>4</sub> ) <sub>2</sub> and CuO NMs obviously reduced disease occurrence by 31%, with subsequent enhancing tomato growth. Mechanistically, Cu based NMs upregulated the expression of PR genes and enhanced the activity of antioxidative enzyme. | Ma et al. (2019) <sup>41</sup>     |
| CuS (size: 5-10 nm)                                                                  | Seed treatment and Foliar application; 50               | Wheat; <i>Gibberella fujikuroi</i>                    | Seed soaking with 50 mg/L CuS NMs (1:4) decreased the disease incidence of bakanae disease in rice by 45.9%. Mechanistically, CuS NMs had high                                                                                                                                               | Shang et al. (2020) <sup>40</sup>  |

|                                                                                      |                                               |                                                                      |                                                                                                                                                                                                                                                                                                                              |                                        |
|--------------------------------------------------------------------------------------|-----------------------------------------------|----------------------------------------------------------------------|------------------------------------------------------------------------------------------------------------------------------------------------------------------------------------------------------------------------------------------------------------------------------------------------------------------------------|----------------------------------------|
|                                                                                      | mg/L                                          |                                                                      | antifungal ability and could active the disease resistance in wheat.                                                                                                                                                                                                                                                         |                                        |
| Glycine-Cu(OH) <sub>2</sub><br>(size: 240 nm)                                        | Foliar application; 200, 400, and 800 Cu mg/L | Chinese cabbage; <i>Xanthomonas campestris</i> pv. <i>campestris</i> | The disease control efficacy of glycine-Cu(OH) <sub>2</sub> NMs was >74.5%. Mechanistically, glycine-Cu(OH) <sub>2</sub> NMs exhibited high antimicrobial ability.                                                                                                                                                           | Dong et al. (2020)                     |
| CuO (size: 30 nm); Cu <sub>3</sub> (PO <sub>4</sub> ) <sub>2</sub> (size: 50-610 nm) | Foliar application; 50 mg/L                   | Tomato; <i>Fusarium oxysporum</i>                                    | CuO and Cu <sub>3</sub> (PO <sub>4</sub> ) <sub>2</sub> NMs application reduced disease progress by approximately 40 and 56%. CuO and Cu <sub>3</sub> (PO <sub>4</sub> ) <sub>2</sub> NMs could modulate crop nutrition to increase resistance to disease.                                                                   | Shen et al. (2020) <sup>42</sup>       |
| CuO (size: 30 nm); Cu <sub>3</sub> (PO <sub>4</sub> ) <sub>2</sub> (size: 50-610 nm) | Foliar application; 50 and 250 mg/L           | Soybean; <i>Fusarium virguliforme</i>                                | CuO and Cu <sub>3</sub> (PO <sub>4</sub> ) <sub>2</sub> NMs significantly alleviated much of the pathogen infection induced soybean biomass loss. Cu based NMs upregulated the expression of PR genes and promoted antioxidative enzyme activity.                                                                            | Ma et al. (2020) <sup>17</sup>         |
| SiO <sub>2</sub> (size: not reported)                                                | Soil amendment; 10.5 g/kg                     | Cucumber; <i>Papaya ring spot virus</i>                              | SiO <sub>2</sub> NMs amendment significantly reduced the disease severity of cucumber from 5.3 to 0.6. Mechanistically, SiO <sub>2</sub> NMs amendment enhanced the expression of PR genes and the activity of antioxidative enzyme.                                                                                         | Elsharkawy and Mousa (2015)            |
| SiO <sub>2</sub> (size: 20 nm)                                                       | Foliar application; 100 mg/L                  | Tobacco; <i>Tobacco mosaic virus</i>                                 | SiO <sub>2</sub> NMs application significantly decreased the relative expression of TMV-CPRNA and the accumulation of TMV protein in tobacco leaves by 79.2 and 47.3%. Mechanistically, SiO <sub>2</sub> NMs had antimicrobial activity and upregulated the expression of PR genes and the activity of antioxidative enzyme. | Cai et al. (2019)                      |
| SiO <sub>2</sub> (size: 54 nm)                                                       | Foliar application; 25-1600 mg/L              | Arabidopsis; <i>Pseudomonas syringae</i>                             | Treatment with SiO <sub>2</sub> NMs (25 mg/L) resulted in a partial reduction of 29% of bacterial growth in host leaves. Mechanistically, SiO <sub>2</sub> NMs activated the SA dependent SAR pathway in Arabidopsis leaves.                                                                                                 | El-Shetehy et al. (2021) <sup>28</sup> |
| SiO <sub>2</sub> (size: 56 nm)                                                       | Foliar application; 1500 mg/L                 | Watermelon; <i>Fusarium oxysporum</i> f. sp. <i>niveum</i>           | Fast dissolving SiO <sub>2</sub> NMs enhanced the growth and yield of watermelon infected with <i>Fusarium oxysporum</i> f. sp. <i>niveum</i> . Mechanistically, fast dissolving SiO <sub>2</sub> NMs could sustainable and efficient provide Si nutrient for                                                                | Kang et al. (2021) <sup>52</sup>       |

|                                                                                               |                                                                                  |                                                      |                                                                                                                                                                                                                                                                                                                         |                                             |
|-----------------------------------------------------------------------------------------------|----------------------------------------------------------------------------------|------------------------------------------------------|-------------------------------------------------------------------------------------------------------------------------------------------------------------------------------------------------------------------------------------------------------------------------------------------------------------------------|---------------------------------------------|
|                                                                                               |                                                                                  |                                                      | watermelon.                                                                                                                                                                                                                                                                                                             |                                             |
| Si <sup>0</sup><br>(size: 5 nm)                                                               | Foliar application; 10, 50, and 150 mg/L                                         | Maize; <i>Mythimna separata</i>                      | 50 mg/L Si <sup>0</sup> NMs significantly inhibited the growth of armyworm on maize leaf surface. Mechanistically, Si <sup>0</sup> NMs increased the production of chlorogenic acid in maize.                                                                                                                           | Wang et al. (2021) <sup>54</sup>            |
| SiO <sub>2</sub><br>(size: 50 nm)                                                             | Foliar application; 1 and 5 mg/L                                                 | Rice; <i>Nilaparvata lugens Stal</i>                 | 5 mg/L SiO <sub>2</sub> NMs application enhanced the fresh biomass of rice shoot by 61.9% in the presence of planthopper. Mechanistically, SiO <sub>2</sub> NMs promoted lignin formation and upregulated the expression of pest resistance related genes in rice.                                                      | Cheng et al. (2021) <sup>53</sup>           |
| CeO <sub>2</sub><br>(size: 8 nm)                                                              | Soil amendment and foliar application; 50 and 250 mg/kg(L)                       | Tomato; <i>Fusarium oxysporum f. sp. lycopersici</i> | Disease severity was significantly reduced by soil amendment (53%) and foliar application (57%) with 250 mg/kg (L) of CeO <sub>2</sub> NMs.                                                                                                                                                                             | Adisa et al. (2018)                         |
| CeO <sub>2</sub><br>(size: 54 nm)                                                             | Soil amendment; 10, 50, and 100 mg/kg                                            | Tomato; <i>Helicoverpa armigera</i>                  | 50 mg/kg CeO <sub>2</sub> NMs amendment enhanced tomato shoot biomass by 38.2% in the presence of herbivore. Mechanistically, CeO <sub>2</sub> NMs enhanced the defense-related compounds in tomatoes.                                                                                                                  | Xiao et al. (2021) <sup>60</sup>            |
| S <sup>0</sup><br>(size: 30 nm)                                                               | Seed treatment and foliar application; 10, 30, 50, 100, and 200 mg/L             | Tomato; <i>Fusarium oxysporum f. sp. lycopersici</i> | 100 mg/L S <sup>0</sup> NMs significantly decreased disease occurrence by 47.6%. Mechanistically, S <sup>0</sup> NMs enhanced the salicylic acid content and activated SAR in tomato.                                                                                                                                   | Cao et al. (2021) <sup>19</sup>             |
| Carbon nanotube<br>(diameter: 30-50nm; length: 10-20 μm),<br>graphene<br>(thickness: 8-12 nm; | Foliar application; carbon nanotube: 50 and 100 mg/L, graphene: 250 and 500 mg/L | Tomato; <i>Fusarium oxysporum</i>                    | Carbon based NMs significantly decreased the disease severity of pathogen infected tomatoes by 40-56% and increased the yield of tomato by 18-25%. Mechanistically, carbon based NMs enhanced the photosynthetic pigments, ascorbic acid and flavonoids, and the activity of the antioxidant enzymes content in tomato. | González-García et al. (2022) <sup>66</sup> |

|                                                                                                                                                            |                                                |                                                     |                                                                                                                                                                                                                                                                                                                                                                                                                                                               |                                     |
|------------------------------------------------------------------------------------------------------------------------------------------------------------|------------------------------------------------|-----------------------------------------------------|---------------------------------------------------------------------------------------------------------------------------------------------------------------------------------------------------------------------------------------------------------------------------------------------------------------------------------------------------------------------------------------------------------------------------------------------------------------|-------------------------------------|
| diameter: 2<br>µm)<br>Nitrogen<br>doped carbon<br>dots<br>(size: 2 nm)<br>reduced<br>graphene oxide<br>(thickness: 0.6-<br>3.7 nm;<br>diameter: 500<br>nm) | Foliar application; 10<br>mg/L                 | Tomato; <i>Ralstonia<br/>solanacearum</i>           | Nitrogen doped carbon dots application suppressed disease severity of tomato by 71.2%. Mechanistically, nitrogen doped carbon dots could direct scavenge excess ROS, enhance antioxidative enzyme activity, and active SAR in tomatoes.                                                                                                                                                                                                                       | Luo et al.<br>(2021) <sup>57</sup>  |
| Chitosan<br>(Size: not<br>reported)                                                                                                                        | Seed treatment; 50, 100,<br>250, and 500 mg/kg | Pearl millet;<br><i>Sclerospora<br/>graminicola</i> | The spread of <i>Podosphaera pannosa</i> on rose leaves was significantly suppressed by 45.9% after foliar application with 200 mg/L reduced graphene oxide. NMs exposure increased plant disease resistance through enhancing the concentration of phytohormones.                                                                                                                                                                                            | Hao et al.<br>(2019) <sup>46</sup>  |
| MgO<br>(Size: 20 nm)                                                                                                                                       | Foliar application; 100,<br>200, and 1000 mg/L | Tomato; <i>Xanthomonas<br/>perforans</i>            | 250 mg/kg chitosan NMs application decreased the disease incidence from 97.5 to 8.3%. Chitosan NMs enhanced host disease resistance against downy mildew through increase nitric oxide generation.<br><br>The disease severity of pathogen infected tomato in MgO NMs treatments was 12-32% less than Kocide 3000+Mancozeb treatments. Mechanistically, MgO NMs had excellent antimicrobial ability.                                                          | Siddaiah et al.<br>(2018)           |
| ZnO<br>(Size:12 nm)                                                                                                                                        | Foliar application; 50<br>and 100 mg/L         | Tomato; <i>Tomato<br/>mosaic virus</i>              | The disease severity of pathogen infected tomato in MgO NMs treatments was 12-32% less than Kocide 3000+Mancozeb treatments. Mechanistically, MgO NMs had excellent antimicrobial ability.<br><br>ZnO NMs significantly alleviated the harmful effects of ToMV infection in tomatoes. Mechanistically, ZnO NMs exhibited high antimicrobial ability and enhanced the content of enzymatic and non-enzymatic antioxidants in tomatoes.                         | Liao et al.<br>(2021) <sup>63</sup> |
| Hydroxyapatite<br>(width: 10 nm;<br>length:10-20<br>nm)                                                                                                    | Foliar application; 9.3<br>and 46.5 mg P/L     | Tomato; <i>Fusarium<br/>oxysporum</i>               | ZnO NMs significantly alleviated the harmful effects of ToMV infection in tomatoes. Mechanistically, ZnO NMs exhibited high antimicrobial ability and enhanced the content of enzymatic and non-enzymatic antioxidants in tomatoes.<br><br>Hydroxyapatite NMs exposure significantly increased the shoot mass of pathogen infected tomato by 40%. Mechanistically, hydroxyapatite significantly elevated PAL activity and total phenolic content in tomatoes. | Sofy et al.<br>(2021) <sup>64</sup> |
|                                                                                                                                                            |                                                |                                                     |                                                                                                                                                                                                                                                                                                                                                                                                                                                               | Ma et al.<br>(2021) <sup>98</sup>   |

|                                                 |                                 |                                          |                                                                                                                                                                                                                                                                                                                                                                                                    |                                    |
|-------------------------------------------------|---------------------------------|------------------------------------------|----------------------------------------------------------------------------------------------------------------------------------------------------------------------------------------------------------------------------------------------------------------------------------------------------------------------------------------------------------------------------------------------------|------------------------------------|
| Fe <sub>3</sub> O <sub>4</sub><br>(Size: 20 nm) | Foliar application; 100<br>mg/L | Tobacco; <i>Tobacco<br/>mosaic virus</i> | The relative tobacco mosaic virus content at the transcription and protein levels was decreased from 1.00 and 1.41 to 0.33 and 0.34 after the application of Fe <sub>3</sub> O <sub>4</sub> NMs. Fe <sub>3</sub> O <sub>4</sub> NMs activated plant antioxidants, and upregulated SA synthesis and the expression of SA-responsive PR genes, thereby enhancing plant resistance against pathogens. | Cai et al.<br>(2020) <sup>62</sup> |
|-------------------------------------------------|---------------------------------|------------------------------------------|----------------------------------------------------------------------------------------------------------------------------------------------------------------------------------------------------------------------------------------------------------------------------------------------------------------------------------------------------------------------------------------------------|------------------------------------|

## References

- E. K. Elbeshehy, A. M. Elazzazy and G. Aggelis, Silver nanoparticles synthesis mediated by new isolates of *Bacillus spp.*, nanoparticle characterization and their activity against Bean Yellow Mosaic Virus and human pathogens. *Front. Microbiol.*, 2015, **6**, 453.
- P. Ponmurugan, K. Manjugarunambika, V. Elango, and B. M. Gnanamangai, Antifungal activity of biosynthesised copper nanoparticles evaluated against red root-rot disease in tea plants. *J. Exp. Nanosci.*, 2016, **11**, 1019-1031.
- R. C. Choudhary, R. V. Kumaraswamy, S. Kumari, S. S. Sharma, A. Pal, R. Raliya, P. Biswas and V. Saharan, Cu-chitosan nanoparticle boost defense responses and plant growth in maize (*Zea mays L.*). *Sci. Rep.*, 2017, **7**, 1-11.
- W. H. Elmer, N. Zuverza-Mena, L. R. Triplett, E. L. Roberts, R. A. Silady and J. C. White, Foliar application of copper oxide nanoparticles suppresses fusarium wilt development on chrysanthemum. *Environ. Sci. Technol.*, 2021, **55**, 10805-10810.
- J. Chen, S. Mao, Z. Xu and W. Ding, Various antibacterial mechanisms of biosynthesized copper oxide nanoparticles against soilborne *Ralstonia solanacearum*. *RSC Adv.*, 2019, **9**, 3788-3799.
- H. Dong, R. Xiong, Y. Liang, G. Tang, J. Yang, J. Tang, J. Niu, Y. Gao, Z. Zhou and Y. Cao, Development of glycine-copper (ii) hydroxide nanoparticles with improved biosafety for sustainable plant disease management. *RSC Adv.*, 2020, **10**, 21222-21227.
- M. M. Elsharkawy and K. M. Mousa, Induction of systemic resistance against *Papaya ring spot virus* (PRSV) and its vector *Myzus persicae* by *Penicillium simplicissimum* GP17-2 and silica (SiO<sub>2</sub>) nanopowder. *Int. J. Pest Manage.*, 2015, **61**, 353-358.
- L. Cai, C. Liu, G. Fan, C. Liu, and X. Sun, Preventing viral disease by ZnONPs through directly deactivating TMV and activating plant immunity in *Nicotiana benthamiana*. *Environ. Sci.: Nano*, 2019, **6**, 3653-3669.
- I. O. Adisa, V. L. Reddy Pullagurala, S. Rawat, J. A. Hernandez-Viezcas, C. O. Dimkpa, W. H. Elmer, J. C. White, J. R. Peralta-Videa and J. L. Gardea-Torresdey, Role of cerium compounds in Fusarium wilt suppression and growth enhancement in tomato (*Solanum lycopersicum*). *J. Agric. Food Chem.*, 2018, **66**, 5959-5970.

C. N. Siddaiah, K. V. H. Prasanth, N. R. Satyanarayana, V. Mudili, V. K. Gupta, N. K. Kalagatur, T. Satyavati, X.F. Dai, J.Y. Chen, A. Mocan, B.P. Singh, and R. K. Srivastava, Chitosan nanoparticles having higher degree of acetylation induce resistance against pearl millet downy mildew through nitric oxide generation. *Sci. Rep.*, 2018, **8**, 1-14.
